# Supplementary material
Source: PubMed Central journal article supplement (PMC3969998)

# Supplemental Figure S1

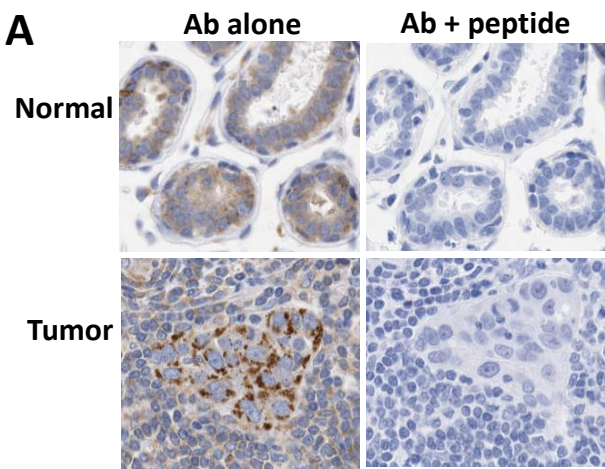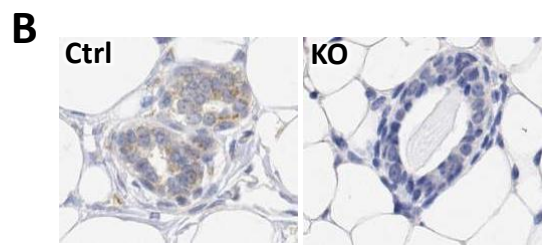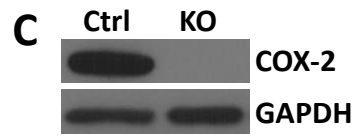

Supplement: mmc1.pdf [file mmc1.pdf]

# Supplemental Figure S2

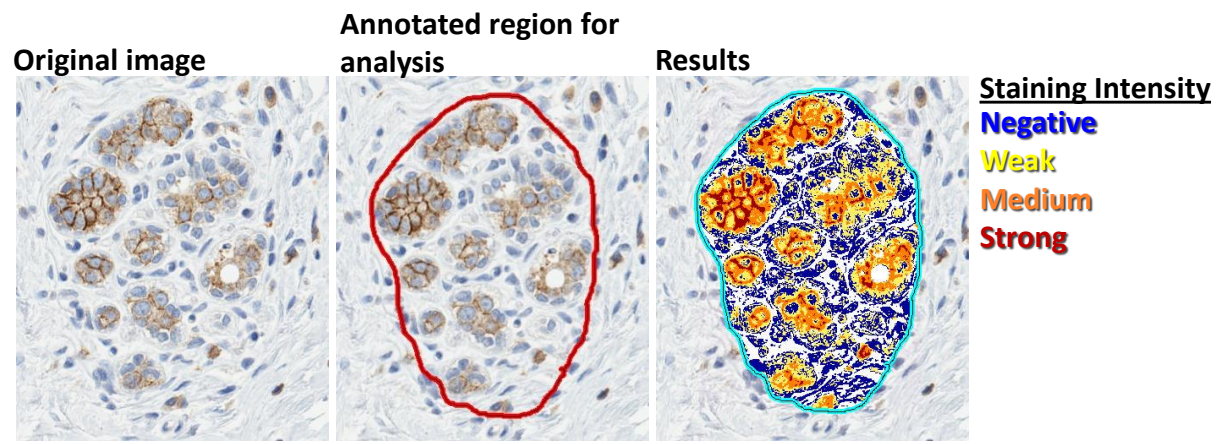

Supplement: mmc2.pdf [file mmc2.pdf]

Supplemental Figure S3

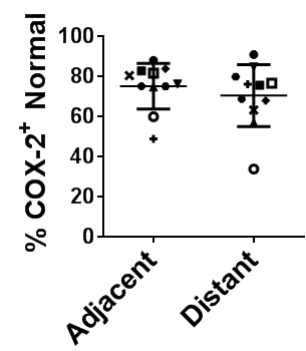

Supplement: mmc3.pdf [file mmc3.pdf]

# Supplemental Figure S4

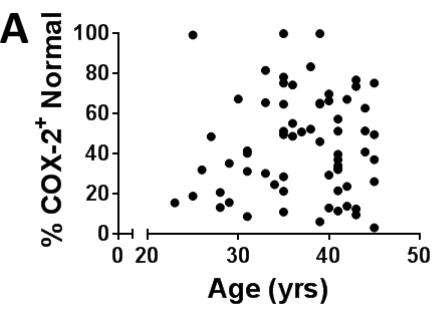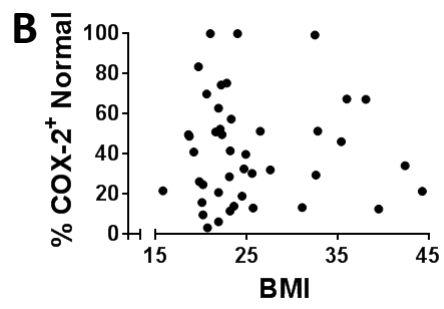

Supplement: mmc4.pdf [file mmc4.pdf]

# Supplemental Figure S5

**Intralobular  
Stroma**

**Interlobular  
Stroma**

**Nullip**

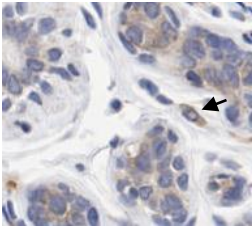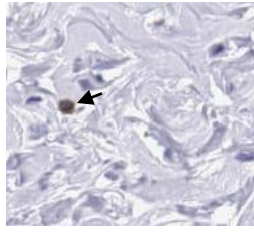

**Preg**

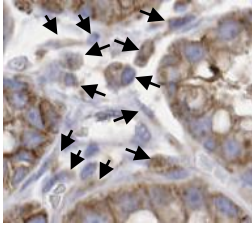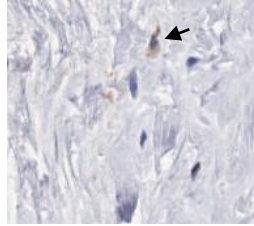

**Inv**

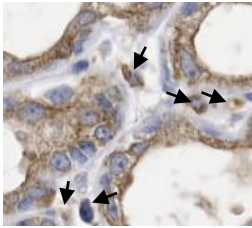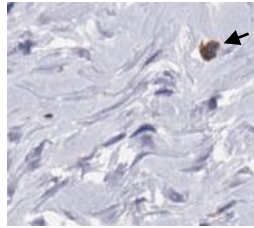

**Parous**

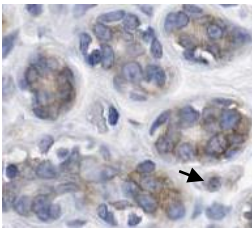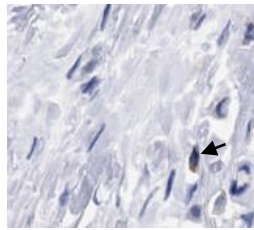

Supplement: mmc5.pdf [file mmc5.pdf]
